1 **Patient derived models of bladder cancer amplify tumor specific gene expression**  
2 **compared to surgical specimen while maintaining gene expression of molecular subtype**  
3 **and epithelial mesenchymal transition markers**

4 Michalis Matri<sup>1</sup>, Swathi Ramakrishnan<sup>2</sup>, Shruti Shah<sup>2</sup>, Ellen Karasik<sup>2</sup>, Bryan M Gillard<sup>2</sup>, Michael  
5 M Moser<sup>2</sup>, Bailey K Farmer<sup>3</sup>, Gissou Azabdaftari<sup>4</sup>, Gurkamal S Chatta<sup>3</sup>, Anna Woloszynska<sup>2</sup>,  
6 Kevin H Eng<sup>1,5\*</sup>, Barbara A Foster<sup>2,\*</sup>, Wendy J Huss<sup>2,\*</sup>

7 <sup>1</sup> Department of Cancer Genetics and Genomics, Roswell Park Compressive Cancer Center,  
8 Buffalo NY 14263

9 <sup>2</sup> Department of Pharmacology and Therapeutics, Roswell Park Compressive Cancer Center,  
10 Buffalo NY 14263

11 <sup>3</sup> Department of Medicine, Roswell Park Compressive Cancer Center, Buffalo NY 14263

12 <sup>4</sup> Department of Pathology, Roswell Park Compressive Cancer Center, Buffalo NY 14263

13 <sup>5</sup> Department of Biostatistics and Bioinformatics, Roswell Park Compressive Cancer Center,  
14 Buffalo NY 14263

15  
16 \* Correspondence: [Wendy.Huss@RoswellPark.org](mailto:Wendy.Huss@RoswellPark.org); +01-716-845-1213 (W.J.H.);  
17 [Barbara.Foster@RoswellPark.org](mailto:Barbara.Foster@RoswellPark.org); +01-716-845-1260 (B.A.F.);  
18 [Kevin.Eng@RoswellPark.org](mailto:Kevin.Eng@RoswellPark.org); +01-716-845-6504 (K.H.E.)  
19

20 **Abstract:** Patient derived models (PDMs) are a powerful tool to study preclinical responses.  
21 However, the benefits of each model have not been compared head-to-head when models are  
22 derived from the same surgical specimen. PDMs derived from surgical specimens were  
23 established as xenografts (PDX), organoids (PDO), and spheroids (PDS). PDMs were  
24 molecularly characterized by RNA sequencing. Differential gene expression was determined  
25 between the PDMs and surgical specimens. Surgical specimens had the most differentially  
26 expressed genes reflecting loss of immune and stromal compartments in PDMs. PDMs and  
27 surgical specimens were clustered using the Euclidian distance analysis to test model fidelity.  
28 PDMs upregulated a clear, patient-specific bladder cancer signal. Overall, the molecular profiles  
29 of PDXs were the most similar to the matching patient surgical specimen than the PDO and PDS  
30 from that patient. The epithelial mesenchymal transition (EMT) gene expression profile is  
31 maintained in the PDMs showing the persistence of EMT in both *in vivo* and *in vitro* model setting.  
32 The consensus molecular subtype was determined in order to compare PDMs to each other and  
33 their matching surgical specimen, and only surgical specimens with Basal/Squamous or Luminal  
34 Papillary molecular subtype established PDMs. Patient derived models reduce tumor  
35 heterogeneity and allow analysis of specific tumor compartments while maintaining the gene  
36 expression profile representative of the original tumor.  
37

38 **1. Introduction**

39 **Bladder cancer is a significant public health problem:** In the United States, approximately  
40 80,470 new patients were diagnosed with bladder cancer with an estimated 17,670 deaths in  
41 2019 (seer.cancer.gov). The majority of cases is non-muscle invasive and is treated by  
42 cystoscopic resection, with or without intravesical medical therapy instilled directly into the  
43 bladder. However, approximately a third of newly diagnosed bladder cancers have muscle-  
44 invasive bladder cancer (MIBC). Therapy for these patients consists of either a radical  
45 cystectomy or definitive chemoradiation therapy. Even with definitive treatment, the mortality  
46 from MIBC remains high.

47 **Consensus Molecular Classification of MIBC:** Platinum-based chemotherapy continues to be  
48 the mainstay of systemic therapy for MIBC. With the exponential increase in knowledge about  
49 the molecular taxonomy of bladder cancer, additional therapeutic modalities are being rapidly  
50 developed. The recent development of a “consensus” classification system allows application of  
51 the molecular subtyping in the clinic to predict more effective treatment options.<sup>1</sup> The six molecular  
52 subtypes in the consensus molecular classification based on 1750 MIBC from 6 datasets,  
53 arranged from most to least differentiated, are: Luminal Papillary (LumP) 24%, Luminal Non-  
54 Specified (LumNS) 8%, Luminal Unstable (LumU) 15%, Stroma-rich 15%, Basal/Squamous  
55 (Ba/Sq) 35%, and Neuroendocrine-like (NE-like) 3%.<sup>1</sup> Although the overall survival outcome is  
56 improved with gemcitabine/cisplatin (G/C) neoadjuvant therapy the overall survival still remains  
57 poor.<sup>2</sup> The LumP and Ba/Sq represent the 2 most common subtypes and account for 59% of  
58 MIBC cases. LumP and Ba/Sq subtypes are at opposite ends of the spectrum of differentiation.  
59 The median overall survival is highest for the more differentiated LumP at 4 years whereas the  
60 median overall survival for patients with the less differentiated Ba/Sq tumors is only 1.2 years.

61 Several studies, including the consensus molecular signatures, show that MIBC with a basal  
62 phenotype have the best outcomes with cisplatin-based neoadjuvant (NAC).<sup>3,4</sup> There are several  
63 weaknesses of molecular analysis in bulk tissue. With bulk RNA sequencing analysis it is unclear  
64 which cellular components are contributing to the signal since the sample tissue is comprised of  
65 multiple components including the tumor, stroma, and immune compartments. Thus, the  
66 selection process of PDM establishment may select for certain cell types and allow analysis of a  
67 more homogenous cell population. Integrating multi-omic analysis further predicted treatment  
68 response in bladder cancer<sup>5</sup> and the use of PDMs can facilitate this analysis when patients’  
69 specimens are limited or need to be reanalyzed with new technology.

## 70 **2. Results**

### 71 *2.1. PDMs established from surgical specimens of bladder cancer.*

72 The ability of each tumor specimen to grow and establish a PDX model was determined by  
73 implanting 55 freshly procured bladder tumor specimens from TURBT or cystectomy procedures  
74 at Roswell Park. Nineteen (19) of 55 specimens grafted into host animals demonstrated tumor  
75 growth of at least 1 cm<sup>3</sup> in the initial passage (34.5%; 95%CI: 21.6-47.5%). Initial growth of the  
76 grafted surgical specimen is considered p0. Nine (9) of the 19 tumors with initial growth (47.4%,  
77 22.6-72.1%) established PDX tumor lines defined as established growth beyond p2 and  
78 demonstrated >80% tumor take rate after a viable freeze. Thus, 9 PDX tumor lines have been  
79 established from 55 patient specimens for a 16.4% (6.3-26.5%) take-rate, similar to previous  
80 studies.<sup>6-9</sup> The histopathology, and deidentified demographic information of patient tumor  
81 specimens that resulted in established PDX models are listed in Table 1, and information for all  
82 patient tumor specimens tested for PDX establishment are listed in the Supplemental Table 1.  
83 There was no correlation between the ability to establish PDX models and tumor stage or  
84 treatment. Specimens were grafted and maintained in sex matched hosts. Interestingly,  
85 specimens from female patients were more likely to establish models at p0 compared to  
86 specimens from male patients (69.2% versus 23.8%, prop test p=0.0075), independent of tumor  
87 stage. PDOs and PDSs were established from either surgical specimens or xenografts to provide  
88 in vitro tools for future analysis; only RP-BL019 and RP-BL022 have a PDO and only RP-BL022  
89 has a PDS derived from the surgical specimen. To determine whether gene expression changes  
90 are associated with specific PDMs, the RNA sequencing from each PDM was analyzed  
91 individually to identify differences within each patient surgical specimen and corresponding model.

92

### 93 *2.2. Molecular comparison of PDMs with original surgical specimen*

#### 94 2.2.1. PDM transcriptomes faithfully represent their corresponding surgical specimen

95 The Euclidian distance between all the samples was calculated using the expression of highly  
96 expressed genes and specifically genes with higher expression in PDM compared to surgical  
97 specimens. These selection criteria filtered out genes that are underrepresented or not expressed  
98 in the tumor cells, like immune and stroma related genes. Using the Euclidian distance between  
99 the samples and the t-distributed stochastic neighboring embedding algorithm to visualize how  
100 similar the samples are, we found that samples cluster with their corresponding surgical specimen  
101 (Figure 1A). This clustering was persistent even when 3D cultures (defined as PDO and PDS)  
102 (Figure 1B), surgical specimens (Figure 1C), or surgical specimen and PDX (Figure 1D) were  
103 removed from the analysis reinforcing the finding that each PDM is more similar to its  
104 corresponding surgical specimen than its model type. Euclidean distance based on gene  
105 expression showed that PDX models are more similar to the surgical specimens followed by PDO  
106 and finally PDS (Figure 1E). For visualization, we identified differentially expressed genes by  
107 paired comparison of each PDM to its corresponding surgical specimen (Figure 1F) confirming  
108 that PDX are the most similar to surgical samples, whereas PDO and PDS are more similar to  
109 each other than surgical specimens or PDX. Of particular note, samples clustered based on  
110 patient or origin and not based on the model type, thus indicating that the PDMs are representative  
111 of its corresponding surgical specimen.

#### 112 2.2.2. PDMs amplify the tumor compartment transcriptome

113 To further examine the relationship between PDM and surgical specimen, differential gene  
114 expression was performed. Analysis between all PDMs and the surgical specimens showed that  
115 a plethora of genes are significantly downregulated in PDM (Figure 2A). We focused on 5 groups  
116 of genes related to tumor, bladder stem cells (BSD), general stem cells (SC), immune system,  
117 and the stroma. Only genes related to the immune system and the stroma were significantly  
118 downregulated in PDM, indicating that PDMs are representative of the tumor compartment but  
119 not the tumor microenvironment. Specific gene expression was visualized for each surgical  
120 specimen and PDM for the 5 tumor related groups of genes (Figure 2B). The gene expression  
121 pattern shows the expression of the individual genes in each of the samples emphasizing that the  
122 majority of the stroma and immune related genes are under-represented in PDM.

#### 123 2.2.3. Hallmark gene set enrichment analysis in surgical specimens and PDMs

124 To further characterize the PDMs, gene set enrichment analysis for the hallmark gene sets was  
125 performed comparing surgical specimen vs. PDX, PDX vs. 3D models, and PDS vs. PDO (Figure  
126 3A). The gene sets were grouped into 8 processes: development; DNA damage; immune; cellular  
127 component; metabolic; stress pathway; proliferation and signaling. Multiple gene sets were  
128 enriched in the surgical samples compared to the PDMs, but only the immune related gene sets  
129 were over-represented in the surgical specimens (Figure 3B). Interestingly, gene sets in the  
130 stress pathway group (apoptosis, protein secretion, reactive oxygen species, and unfolded  
131 protein) were enriched in the 3D culture PDM compared to the PDX (Figure 3C). Surprisingly,  
132 immune related gene sets were over-represented in PDS compared to PDO (Figure 3D)  
133 suggesting that immune related genes may be reactivated in spheroids due to the more stem-like  
134 phenotype of PDS model.

#### 135 2.2.4. EMT and Molecular Subtypes of MIBC Analysis of PDMs and Surgical Specimens.

136 The EMT hallmark gene set was enriched in all three comparisons (Figure 3A). The enrichment  
137 score for the EMT gene set showed that SURG is enriched vs. PDMs, PDX is enriched vs. 3D  
138 cultures and PDS is enriched vs. PDO models (Figure 4A). The EMT enrichment in PDS confirms

139 the ability of cells with an EMT phenotype to establish as spheroids, compared to PDOs grown in  
140 media with differentiation factors. To determine how the EMT gene set was specific to the original  
141 surgical specimen derived models, Euclidean distance analysis was performed. The t-SNE  
142 representation of the Euclidean distance showed that expression of EMT genes was not enough  
143 to cluster the samples per patient, indicating that other biological processes define the surgical  
144 specimen (Figure 4B). The expression level of the EMT gene set for each surgical specimen and  
145 PDM shows that surgical specimens have increased levels of the EMT genes compared to the  
146 PDMs (Figure 4C). In addition, PDX models derived from patients that received treatment (RP-  
147 BL003, RP-BL019, and RP-BL022) had lower expression of EMT genes compared to the PDX  
148 derived from patients that were treatment naive. No pattern was obvious between PDO or PDS  
149 derived from patients that received treatment to those that were derived from patients that were  
150 treatment naive, indicating that the culture conditions used to derive the PDO and PDS alter the  
151 expression of the EMT genes.

152 The consensus molecular subtyping developed to classify MIBC<sup>1</sup> was analyzed in order to  
153 determine if EMT maintenance in the PDMs was associated with any specific molecular subtype  
154 in the surgical specimens. The consensus molecular subtype classification of MIBC was analyzed  
155 for each surgical specimen and PDM to determine if the molecular subtype can be used to classify  
156 PDMs in order to provide pre-clinical models for each molecular subtype to facilitate treatment  
157 options. The molecular subtypes were determined for seven surgical specimens and their  
158 matched PDX models, as well as, six PDO and PDS models derived from the PDX models.  
159 Although the molecular subtype classification was designed for MIBC surgical specimens, the  
160 majority of the corresponding surgical specimens and their derived PDXs were classified as the  
161 same molecular subtype (Figure 4D). A high percent (5/7) of the surgical specimens that  
162 established PDMs were classified as the Basal/Squamous (Ba/Sq) molecular subtype, and most  
163 molecular classification of the PDMs corresponded to the surgical specimen molecular subtype.  
164 Interestingly, the Ba/Sq specimens were able to give rise to both Ba/Sq and Luminal Papillary  
165 (LumP) models (RP-BL054 and RP-BL003), whereas LumP specimens only gave rise to LumP  
166 models (RP-BL019 and RP-BL022).

### 167 2.3. *Histopathology and differentiation marker analysis*

168 Historically, the tumor stage and histopathology has provided key information to determine the  
169 course of treatment, however there is little association of histopathology, expression of  
170 differentiation markers and molecular subtypes in PDMs. Characterizing each model for  
171 histopathology and molecular subtype will allow better model selection for pre-clinical trials. To  
172 determine how well the consensus molecular phenotype associates with tumor histopathology,  
173 the available surgical specimens and PDXs were evaluated by a GU pathologist. The molecular  
174 subtype and histopathology were consistent between 5/8 surgical specimens and their derived  
175 PDX models. There was a discrepancy between the pathology and molecular subtypes in RP-  
176 BL005, 003, 022 PDXs (Table 2).

177 Generally, the PDX histopathology was in agreement with that of the surgical specimen,  
178 although there was a trend towards the PDX being more undifferentiated with a gain of the  
179 squamous phenotype. In order to further elucidate the differences in the histopathology and the  
180 molecular subtype in RP-BL005, 003, and 022, IHC for markers of differentiation was performed  
181 in PDX tumors. PDX sections were analyzed by IHC to identify E-cadherin (epithelial cells), CK5  
182 (basal marker) and CK 20 (superficial/intermediate urothelium marker), vimentin (EMT) and  
183 synaptophysin (NE marker) expressing cells (Figure 5). The IHC analysis for BL-051, 050, 040,  
184 054, 019 were as expected based on the histopathology and molecular subtypes (Data Not  
185 Shown). PDX models were characterized based on pathology, molecular subtype, gene

186 expression, and IHC. The RP-BL005 PDX has a sarcomatoid pathology, a Ba/Sq molecular  
187 subtype classification with high expression of E-cadherin and CK5 protein expression, but also  
188 expresses an EMT markers gene expression profile (Figure 4B) and vimentin protein expression.  
189 The RP-BL003 has a squamous differentiation pathology, LumP molecular subtype classification,  
190 while high E-cadherin and CK5 protein expression that confirms the squamous differentiation  
191 histopathology, but the low expression of CK20 does not correspond to the LumP molecular  
192 subtype; additionally, there is high synaptophysin protein expression that does not correspond to  
193 histopathology or molecular subtyping. The RP-BL022 PDX has NE differentiation  
194 histopathology, but a LumP molecular subtype. The expression of E-cadherin and CK20 protein  
195 expression supports the LumP molecular subtype, while synaptophysin protein expression  
196 supports the NE histopathology. The differentiation marker expression can help characterize the  
197 PDX models when there is discrepancy between the histopathology and the molecular subtype  
198 classification, but cells express multiple differentiation markers.

## 199 Discussion

200 The gene expression analysis comparing all three PDMs to the original surgical specimen  
201 allows the development of PDMs to test targeted and personalized therapy for bladder cancer.  
202 We classified the molecular subtype of 8 established bladder PDMs, and some PDMs may more  
203 faithfully reflect a particular molecular subtype, whereas others may better capture treatment  
204 response. In upper tract urothelial cancer PDX models, surgical specimens (growth and no  
205 growth n=70) were classified as primarily LumP (82.5%), LumU (8.75%), LumNS, Stroma-rich,  
206 and Ba/Sq (1.25%). There was a 16/17 histological concordance, and trend toward more invasive  
207 specimens more likely to establish PDX models.<sup>10</sup> Our studies, did not include upper tract  
208 urothelial cancer and the enrichment of Ba/Sq (5/7) in our studies highlights the differences  
209 between these two types of cancers and possibly the variation in model development between  
210 the two groups. An understanding of how preclinical models with different molecular subtypes  
211 respond to different therapeutic approaches will allow for personalized medicine and improve  
212 therapeutic outcomes. Several studies, including the consensus molecular signatures, show that  
213 MIBC with a basal phenotype have the best outcomes with cisplatin-based neoadjuvant (NAC)  
214 therapy.<sup>3,4</sup> Thus determining the treatment response in these PDMs is an important future study.

215 Each PDM has selective pressures that are likely to affect the population of cells within the  
216 model. PDX models largely retain the same mutations and biological responses to therapies as  
217 observed in the surgical specimen from which they were derived.<sup>8, 11, 12</sup> PDXs can be used to  
218 evaluate the biological response to therapeutic agents and molecular manipulations.<sup>13-15</sup> PDX  
219 models, in which a patient's tumor is grafted into an immunocompromised mouse, serve as a tool  
220 for preclinical investigation of tailored therapy and have the potential to meet the challenges  
221 described above. Advantages of PDXs include their ability to maintain original tumor  
222 heterogeneity and to circumvent confounding issues such as altered gene expression that result  
223 from serial passage of established cell lines grown on plastic. PDXs retain the variety of cell types  
224 found in the original tumor, such as vasculature, lymphatics, fibroblasts, smooth muscle, and,  
225 depending on the host, limited immune cells.<sup>16</sup> Drawbacks of PDX models are contaminating  
226 mouse cells from the host, higher costs and longer time frames associated with working with mice  
227 compared to cells growing in culture, as well as the lack of an intact immune system in the host  
228 animal. Work by various investigators highlights the promise of personalized PDXs to predict  
229 drug response in the clinical setting, development of predictive biomarkers, and understanding  
230 mechanisms of treatment response or resistance.<sup>8, 12, 17, 18</sup> PDXs offer a unique opportunity to  
231 evaluate the therapeutic response of a single tumor to multiple agents including growth of the

232 tumor with no treatment.

233 The growth conditions for PDOs establishment promotes differentiation and give rise to the  
234 various different cell types within a tumor; thus, PDOs may better reflect the bulk tumor phenotype  
235 and therapeutic initial response of the cancer tissue from which they are derived, relative to other  
236 experimental models like established 2D cell lines. Conversely, the PDS assay is often used to  
237 enrich for the cancer stem cell population and test cancer stem cell properties *in vitro*.<sup>19-22</sup>  
238 Quantitation of cell viability, sphere number and size following treatment can provide a  
239 straightforward readout of therapy effectiveness on the cancer stem cell population. Cancer stem  
240 cells are speculated to be a potential source of therapy-resistant cells leading to recurrent  
241 disease.<sup>23</sup> The PDS model is the most likely model to contain a high number of cancer stem cells  
242 and may have the least selective pressure to adapt to culture and the least heterogeneity because  
243 each sphere is clonally derived. Our data showed that PDS have a strong ETM gene expression  
244 profile compared to PDO (Figure 4A), confirming that PDS are more mesenchymal whereas PDO  
245 are more epithelial.

246 The PDMs were analyzed to determine if there was a common selection type for a particular  
247 PDM, were PDM more similar to each other or is the gene expression more like the original  
248 surgical specimen. Interestingly, all PDMs were more similar to the surgical specimen they were  
249 derived from (Figure 1). Transcriptomic data supports that variability is derived from interpatient  
250 differences and not the models. In addition, all PDMs amplify tumor signal, thus, we have a way  
251 to “purify” messy tumors before evaluating their transcriptome. Finally, PDMs reduce tumor  
252 heterogeneity and allow analysis of specific tumor compartments while maintaining the gene  
253 expression profile representative of the original tumor.

254

## 255 **4. Materials and Methods**

256 All materials used are provided in Supplemental Tables 2-5 and were sourced from companies in  
257 the USA unless indicated.

### 258 *4.1 Ethics Statement*

259 All of the tissue samples were collected under an Institutional Review Board (IRB)-approved  
260 protocol at Roswell Park Comprehensive Cancer Center. Specimens were collected after IRB-  
261 approved written consent from the patient was obtained at Roswell Park. All experiments were  
262 conducted and approved under our Institutional Animal Care and Use Committee (IACUC)  
263 protocol at Roswell Park.

264

### 265 *4.2 Human Specimen Procurement*

266 Fresh human bladder tissue, procured from transurethral resection of bladder tumor (TURBT)  
267 surgical specimens or radical cystectomies, were stored in static preservation solution (SPS-1™)  
268 up to 16 hours at 4°C. Tumor specimens were obtained from the Pathology Network Shared  
269 Resource at Roswell Park. Deidentified demographics (clinical stage, procedure, gender, age,  
270 ethnicity, smoking status, and treatment prior to specimen collection) are listed in Supplemental  
271 Table 1.

272

### 273 *4.3 Patient Derived Models*

#### 274 *4.3.1 Xenograft Generation*

275 The Experimental Tumor Model shared resource received patient samples for grafting into sex  
276 matched NOD.Cg-Prkdc<sup>scid</sup> Il2rg<sup>tm1Wjl</sup>/SzJ mice (JAX, Bar Harbor, ME) hosts, also known as NOD

277 SCID gamma (NSG). Patient samples that grow in NSG are designated as p0, and the next  
278 passage in NSG is p1, and so on. For bladder tumor samples, 0.5 -1 mm<sup>3</sup> tumor pieces are  
279 dipped in Matrigel® and grafted subcutaneously (subQ) into the flank of host NSG mice. From  
280 the patient sample, 5-8 gender matched NSG hosts are grafted. PDX-p0s that grow from the  
281 patient sample are expanded by two additional rounds of growth (p1, p2) in sex matched NSG  
282 hosts.

#### 283 4.3.2 Organoid and Spheroid generation and culture

284 Tumor tissue from surgical specimens and PDX models was minced and enzymatically  
285 digested in a modified protocol from previously published protocols.<sup>24, 25</sup> Briefly, samples are  
286 incubated in a collagenase, dispase and DNase solution (Supplemental Table 3) in a 50 mL flask  
287 for 1-2 hours at 37°C with gentle stirring. If necessary, red blood cells are removed by lysis using  
288 RBC lysis buffer, epithelial cells can be isolated with a Histopaque gradient and plated for 3D  
289 culture as previously described.<sup>25</sup> Single cells are passed through a 100 µm cell strainer and  
290 resuspended in media appropriate for either organoid<sup>26</sup> or spheroid<sup>27, 28</sup> generation. Media  
291 components are listed in Supplemental Table 4.

292 For organoid growth, viable suspended cells were cultured in 5% Matrigel in defined organoid  
293 media mixture using the base R-spondin organoid culture system<sup>26</sup> with growth factor conditions  
294 adapted for use with urothelial TCC. PDOs were expanded at a low rate of 2-4 fold after a dispase  
295 digestion (2.4 Units/ml in DPBS) of Matrigel followed by PDO digestion by TrypLE Express.  
296 Spheroids were established by seeding 1x10<sup>3</sup> viable single cells/well in 24-well, ultra-low  
297 adhesion plates in 5% Matrigel in defined spheroid media. PDSs were passaged by digestion of  
298 the Matrigel with dispase, followed by digestion of the spheroids with trypsin. Once PDOs and  
299 PDSs reach p2 growth in multiple wells, aliquots were cryopreserved for RNA sequencing and a  
300 viable freeze in 10% DMSO.

301

#### 302 4.4 Authentication of models and patient surgical samples:

303 Short tandem repeats (STR) profiles were performed by Roswell Park's Genomic Shared  
304 Resource (GSR) to authenticate that PDXs are derived from the matching patient sample. Flash  
305 frozen patient tumor samples were collected at the time of procurement and sent to GSR for DNA  
306 isolation and STR profile analysis. AmpFLSTR® Identifier® Plus PCR Amplification Kit for STR  
307 profiling which utilizes fifteen STR loci and a sex-determining marker Amelogenin. PDX STR  
308 profile was compared to the patient tumor STR profile. A match of patient and PDM was called if  
309 the STR profile has a ≥90% match.

310

#### 311 4.5 Histology and Immunohistochemistry (IHC):

312 PDX tissues were embedded in paraffin. Serial sections (5 µm) were cut and mounted on glass  
313 slides. Slides were deparaffinized in xylene, rehydrated through a graded series of alcohol  
314 washes, and equilibrated in double distilled water. Slides were incubated in 1x pH6 citrate buffer  
315 using DAKO PT link for 20 minutes, moved to DAKO Autostainer Plus for incubation in 3% H<sub>2</sub>O<sub>2</sub>  
316 for 15 min. To block non-specific binding, tissues were incubated with 10% normal goat serum  
317 for 10 min, followed by avidin/biotin block. Antibodies used are listed in Supplemental Table 5.  
318 Primary antibodies E-Cadherin, CK5, CK20, Synaptophysin, Vimentin were diluted in 1% BSA  
319 solution and incubated for 30 minutes at room temperature All of the slides were incubated with  
320 the Goat anti Rabbit biotinylated secondary antibody for 15 minutes at room temperature. For  
321 signal enhancement, ABC reagent was applied for 30 minutes. To reveal endogenous peroxidase  
322 activity, slides were incubated with DAB substrate for 5 minutes and counterstained with DAKO  
323 Hematoxylin for 20 seconds.

324

#### 325 4.6 RNA Isolation and Sequencing:

326 RNA/DNA extraction was performed in the Genomics Shared Resource (GSR) at Roswell Park.  
327 The purification of total RNA is prepared using the miRNeasy micro kit (Qiagen 217084). Frozen  
328 tissues, organoid suspensions, and spheroid suspension samples are first suspended in 700  $\mu$ l  
329 of Qiazol reagent. The samples were homogenized using Navy Rhino tubes in a Bullet Blender  
330 Homogenizer (Next Advance) for 5 minutes. The homogenate was removed and incubated in a  
331 new tube at room temperature. After addition of chloroform, the homogenate was separated into  
332 aqueous and organic phases by centrifugation. RNA partitions to the upper, aqueous phase, while  
333 DNA partitions to the interphase and proteins to the lower, organic phase or the interphase. The  
334 upper, aqueous phase is extracted, and ethanol is added to provide appropriate binding  
335 conditions for all RNA molecules from 18 nucleotides upwards. The sample is applied to the  
336 miRNeasy micro spin column, where the total RNA binds to the membrane and phenol and other  
337 contaminants are efficiently washed away. On-column DNase digestion was performed to remove  
338 any residual genomic DNA contamination followed by additional washes. High quality RNA was  
339 eluted in 25  $\mu$ l of RNase-free water. Quantitative assessment of the purified total RNA is  
340 accomplished by using a Qubit High Sensitivity RNA kit (ThermoFisher), and concentration is  
341 determined by Ribogreen fluorescent binding to isolated RNA. The RNA was further evaluated  
342 qualitatively using RNA High Sensitivity tape on the 4200 TapeStation (Agilent technologies),  
343 where sizing of the RNA was determined, and a qualitative numerical score (RINe) is assigned.  
344 Amplified cDNA was generated using the SMART-Seq v4 Ultra Low Input RNA kit (Clontech).  
345 10 ng of total RNA was fragmented based on %DV200 analysis and used to synthesize first-  
346 strand cDNA utilizing proprietary template switching oligos. Amplified double strand (ds) cDNA  
347 was created by LD PCR using blocked PCR primers and unique sample barcodes are  
348 incorporated. The resulting ds cDNA was purified using AmpureXP beads (Beckman Coulter).  
349 Abundant Ribosomal cDNA was depleted using R probes, and 13 cycles of PCR using universal  
350 PCR primers to complete the library. The final libraries were purified using AmpureXP beads and  
351 validated for appropriate size on a 4200 TapeStation D1000 Screentape (Agilent Technologies,  
352 Inc.). The libraries are quantitated using KAPA Biosystems qPCR kit, and were pooled together  
353 in an equimolar fashion, following experimental design criteria. Each pool was denatured and  
354 diluted to 400pM with 1% PhiX control library. The resulting pool was loaded into 200cycle  
355 NovaSeq Reagent cartridge for 2X100 sequencing and sequenced on a NovaSeq6000 following  
356 the manufacturer's recommended protocol (Illumina Inc.).

357

## 358 *4.7 Bioinformatics*

### 359 *4.7.1 RNA data processing*

360 Sequencing quality control was assessed using FASTQC v0.11.5 (available online at:  
361 <http://www.bioinformatics.babraham.ac.uk/projects/fastqc/>). Reads were aligned to the human  
362 genome GRCh38 release 27 (Gencode) using STAR v2.6.0a<sup>29</sup> and post-alignment quality control  
363 was assessed using RSeQC v2.6.5.<sup>30</sup> Aligned reads were quantified at the gene level using  
364 RSEM v1.3.1.<sup>31</sup> RSEM estimated gene counts were filtered and upper quartile normalized using  
365 the R-based Bioconductor package edgeR.<sup>32</sup> Differential gene expression was performed after  
366 voom transformation followed by linear regression using the R-based Bioconductor package  
367 Limma.<sup>33</sup>

368

### 369 *4.7.2 Euclidean distance calculations*

370 For t-distributed stochastic neighbor embedding (t-SNE) we first defined Euclidean distance  
371 based on the expression of a subset of genes. Genes were selected based on the average  
372 expression in all PDM and surgical specimens. Genes highly expressed in PDMs compared to  
373 surgical specimens were chosen. t-SNE plots were made using the R-based package Rtsne  
374 (<https://github.com/jkrijthe/Rtsne>).<sup>34, 35 36</sup>



375

376 **4.7.3 Hallmark Gene Set, EMT, consensus molecular subtype analysis**

377 Gene set enrichment analysis was performed using the R-based Bioconductor package fgsea  
378 <sup>37</sup> for the hallmark gene sets from the molecular signatures database (MSigDB).<sup>38, 39</sup> Molecular  
379 subtype classifications were performed on all surgical and PDM specimens using the consensus  
380 MIBC R package.<sup>4</sup> RNA sequencing data were used and molecular subtype was assigned to  
381 samples only if it had a correlation value greater than 0.3. This package can identify 6 molecular  
382 classes: Luminal Papillary (LumP), Luminal Non Specified (LumNS), Luminal Unstable (LumU),  
383 Stroma-rich, Basal/Squamous (Ba/Sq), Neuroendocrine-like (NE-like).

384 **Supplementary Materials:** Supplemental Tables 1-5

385 **Funding:** This research was funded by the Roswell Park Alliance Foundation and NCI grant P30  
386 CA016056 involving the use of Roswell Park Comprehensive Cancer Center's Genomic Shared  
387 Resource, Experimental Tumor Model Resource, Laboratory Animal Shared Resource, Pathology  
388 Network Shared Resource, and Biomedical Data Service.

389 **Conflicts of Interest:** The authors declare no conflict of interest

390

## Tables

**Table 1: Surgical specimen demographics with established >p3 PDX models**

| RP-BL | Stage | Treatment        | Response                                         | Pathology                                             | Sex | Age | Ethnicity | Smoking Status |
|-------|-------|------------------|--------------------------------------------------|-------------------------------------------------------|-----|-----|-----------|----------------|
| 003   | T3    | G/C              | Non-Responder, Deceased                          | HG urothelial carcinoma                               | F   | 57  | AA        | Current        |
| 005   | T2    | None             | No Follow up                                     | HG urothelial with sarcomatoid features               | M   | 83  | C         | Former         |
| 019   | T3    | G/C              | Non-Responder, Deceased                          | HG urothelial carcinoma                               | F   | 66  | C         | Former         |
| 022   | T2    | G/C              | Non-Responder                                    | HG papillary urothelial                               | M   | 76  | C         | Former         |
| 040   | T1    | None             | Deceased                                         | HG with prominent squamous differentiation            | F   | 72  | C         | Never          |
| 050   | T3    | None             | No Treatment                                     | HG urothelial carcinoma with squamous differentiation | F   | 76  | C         | Never          |
| 051   | T2    | None             | Non-Responder, currently Pembrolizumab Treatment | HG papillary urothelial carcinoma                     | M   | 60  | C         | Never          |
| 052*  | T3    | BCG, G/C, pembro | Non-Responder, Deceased                          | Recurrence, HG papillary urothelial carcinoma         | F   | 64  | C         | Former         |
| 054   | T2    | None             | No Treatment, Deceased                           | HG papillary urothelial carcinoma                     | F   | 85  | C         | Never          |

\*Not sequenced due to multiple treatments of patient prior to specimen collection. BCG = Bacillus Calmette-Guerin; G/C = Gemcitabine/Cisplatin; Pembro=pembrolizumab; HG=high grade; F=Female; M=Male; C=Caucasian; AA=African American;

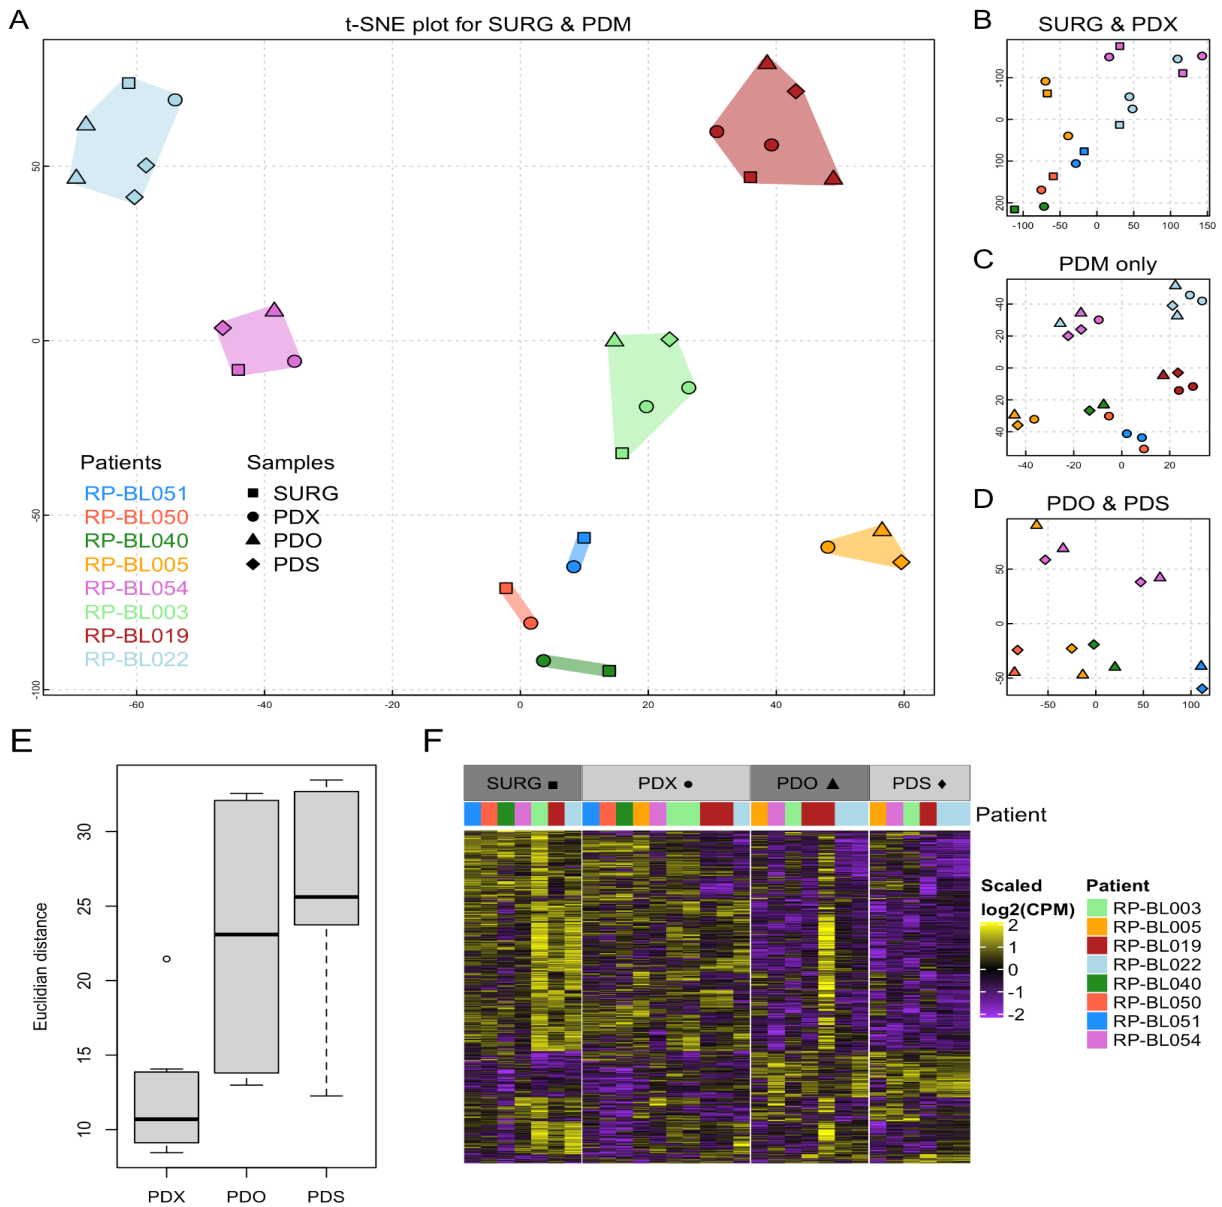

**Figure 1. PDMs are a faithful representation of their original tumor.**

(A-D) Euclidean distance was visualized with t-SNE for (A) all samples, (B) surgical and PDX samples, (C) only PDM samples, and (D) PDO and PDS samples.

(E) Euclidean distance of each PDM to their corresponding surgical specimen.

(F) Heatmap of differentially expressed genes identified by paired comparison of PDM compared to their corresponding surgical specimen.

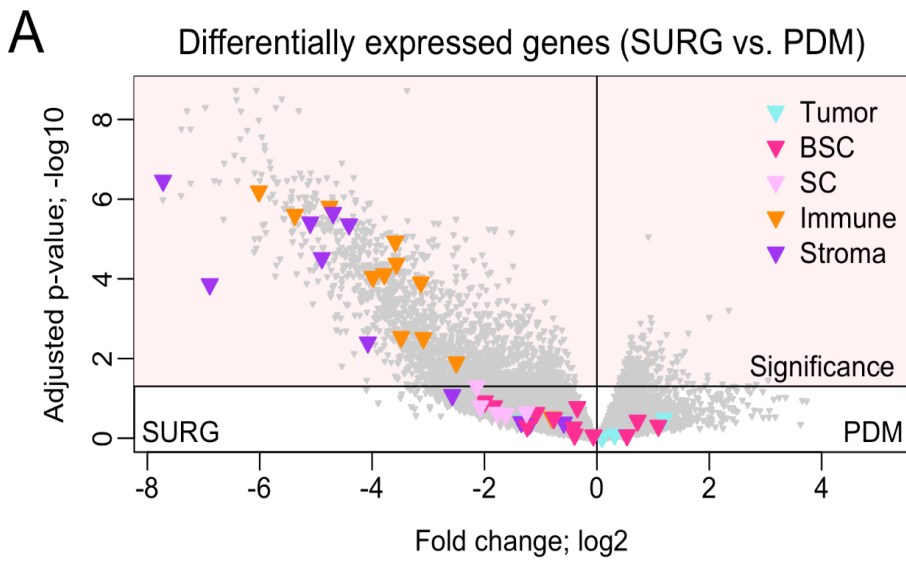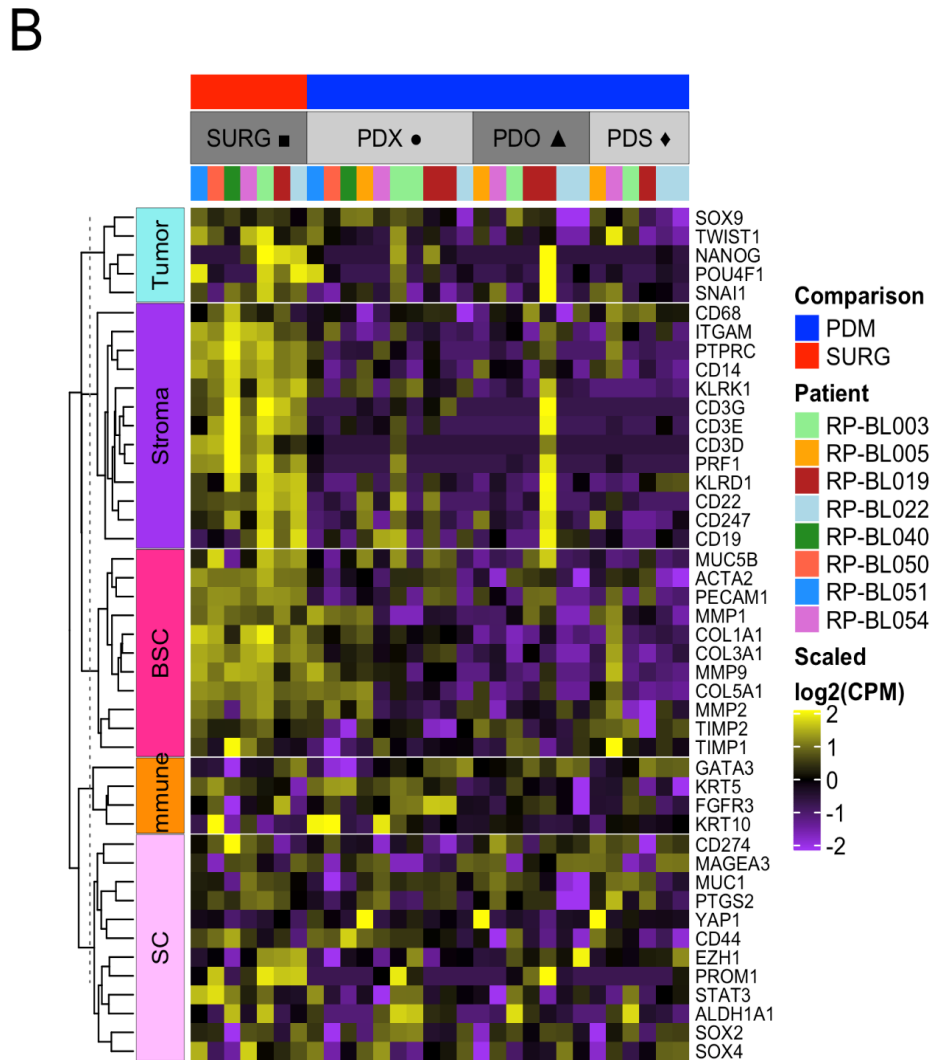

**Figure 2. PDMs represent the tumor but not the TME.**

(A) Heatmap of gene expression corresponding to tumor, bladder cancer stem cell (BSC), stem cell (SC), immune, and stroma genes. (B) Volcano plots of differentially expressed genes comparing surgical specimens to PDM emphasizing the selected genes for tumor and tumor microenvironment.

A

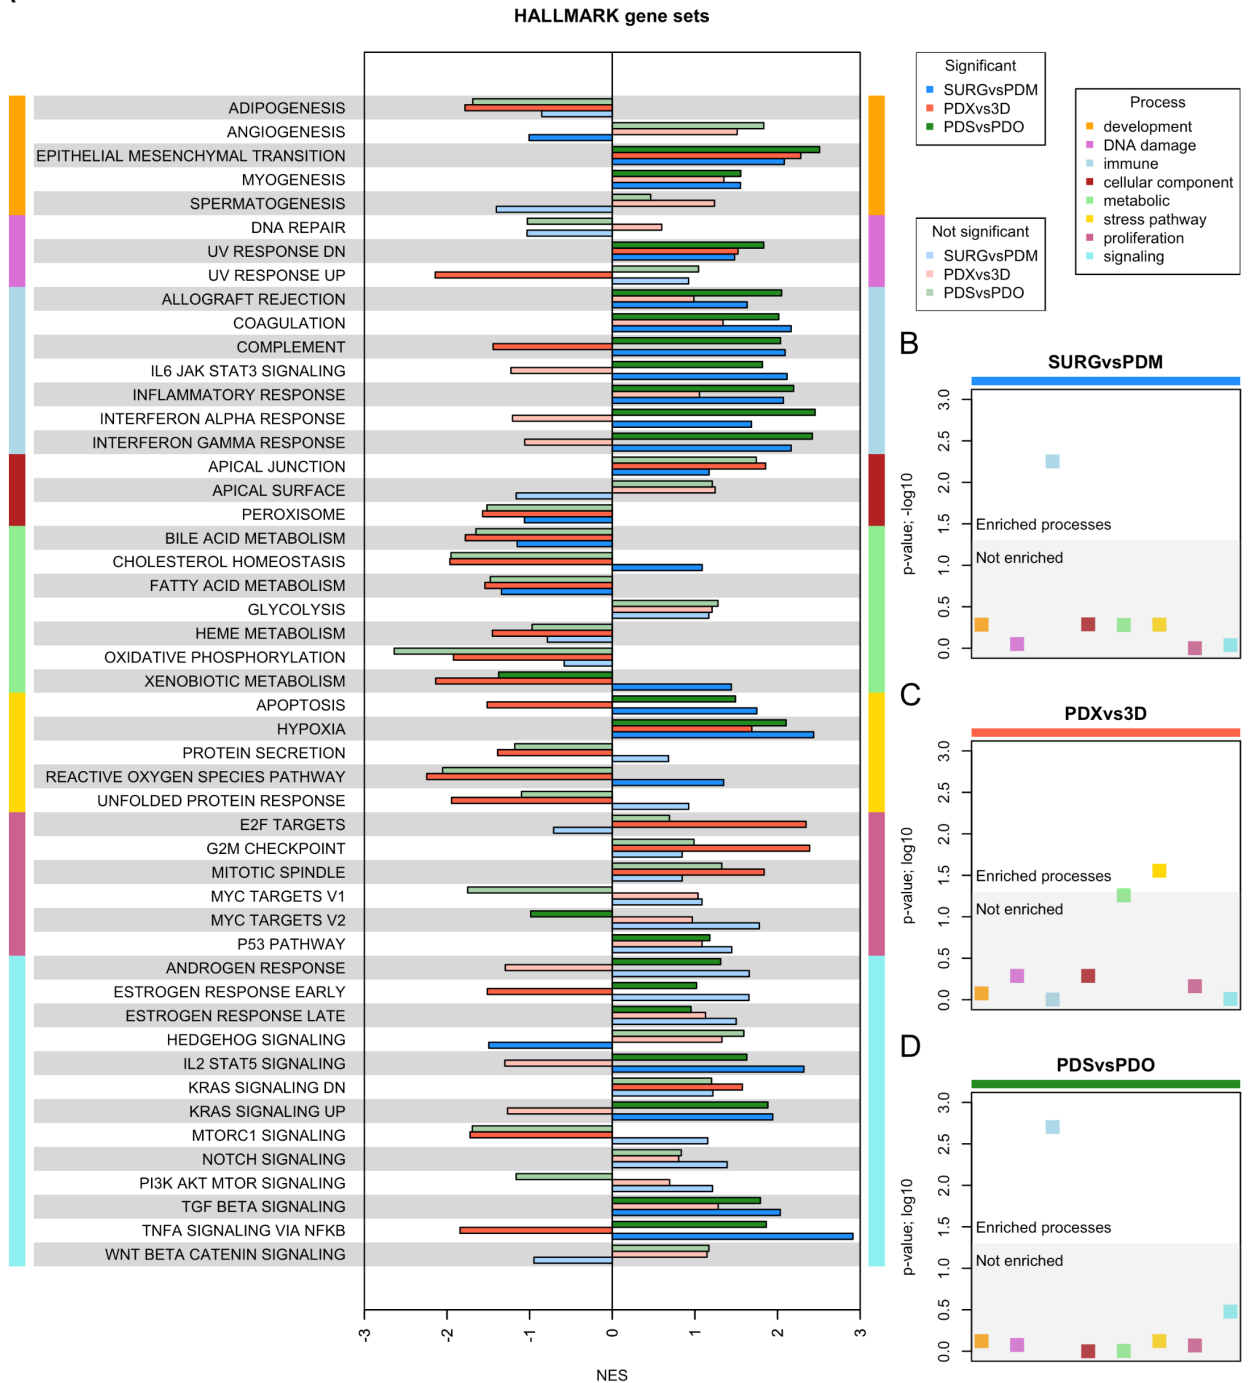

**Figure 3. Hallmark pathway analysis RNAseq.**

(A) Gene set enrichment analysis for all the hallmark gene sets for 3 different comparison (SURG vs. PDM, PDX vs. 3D, PDS vs. PDO). Gene sets were categorized based on processes.

(B-D) Enrichment of processes based on fisher exact test for (B) SURG vs PDM, (C) PDX vs 3D, and (D) PDS vs PDO.

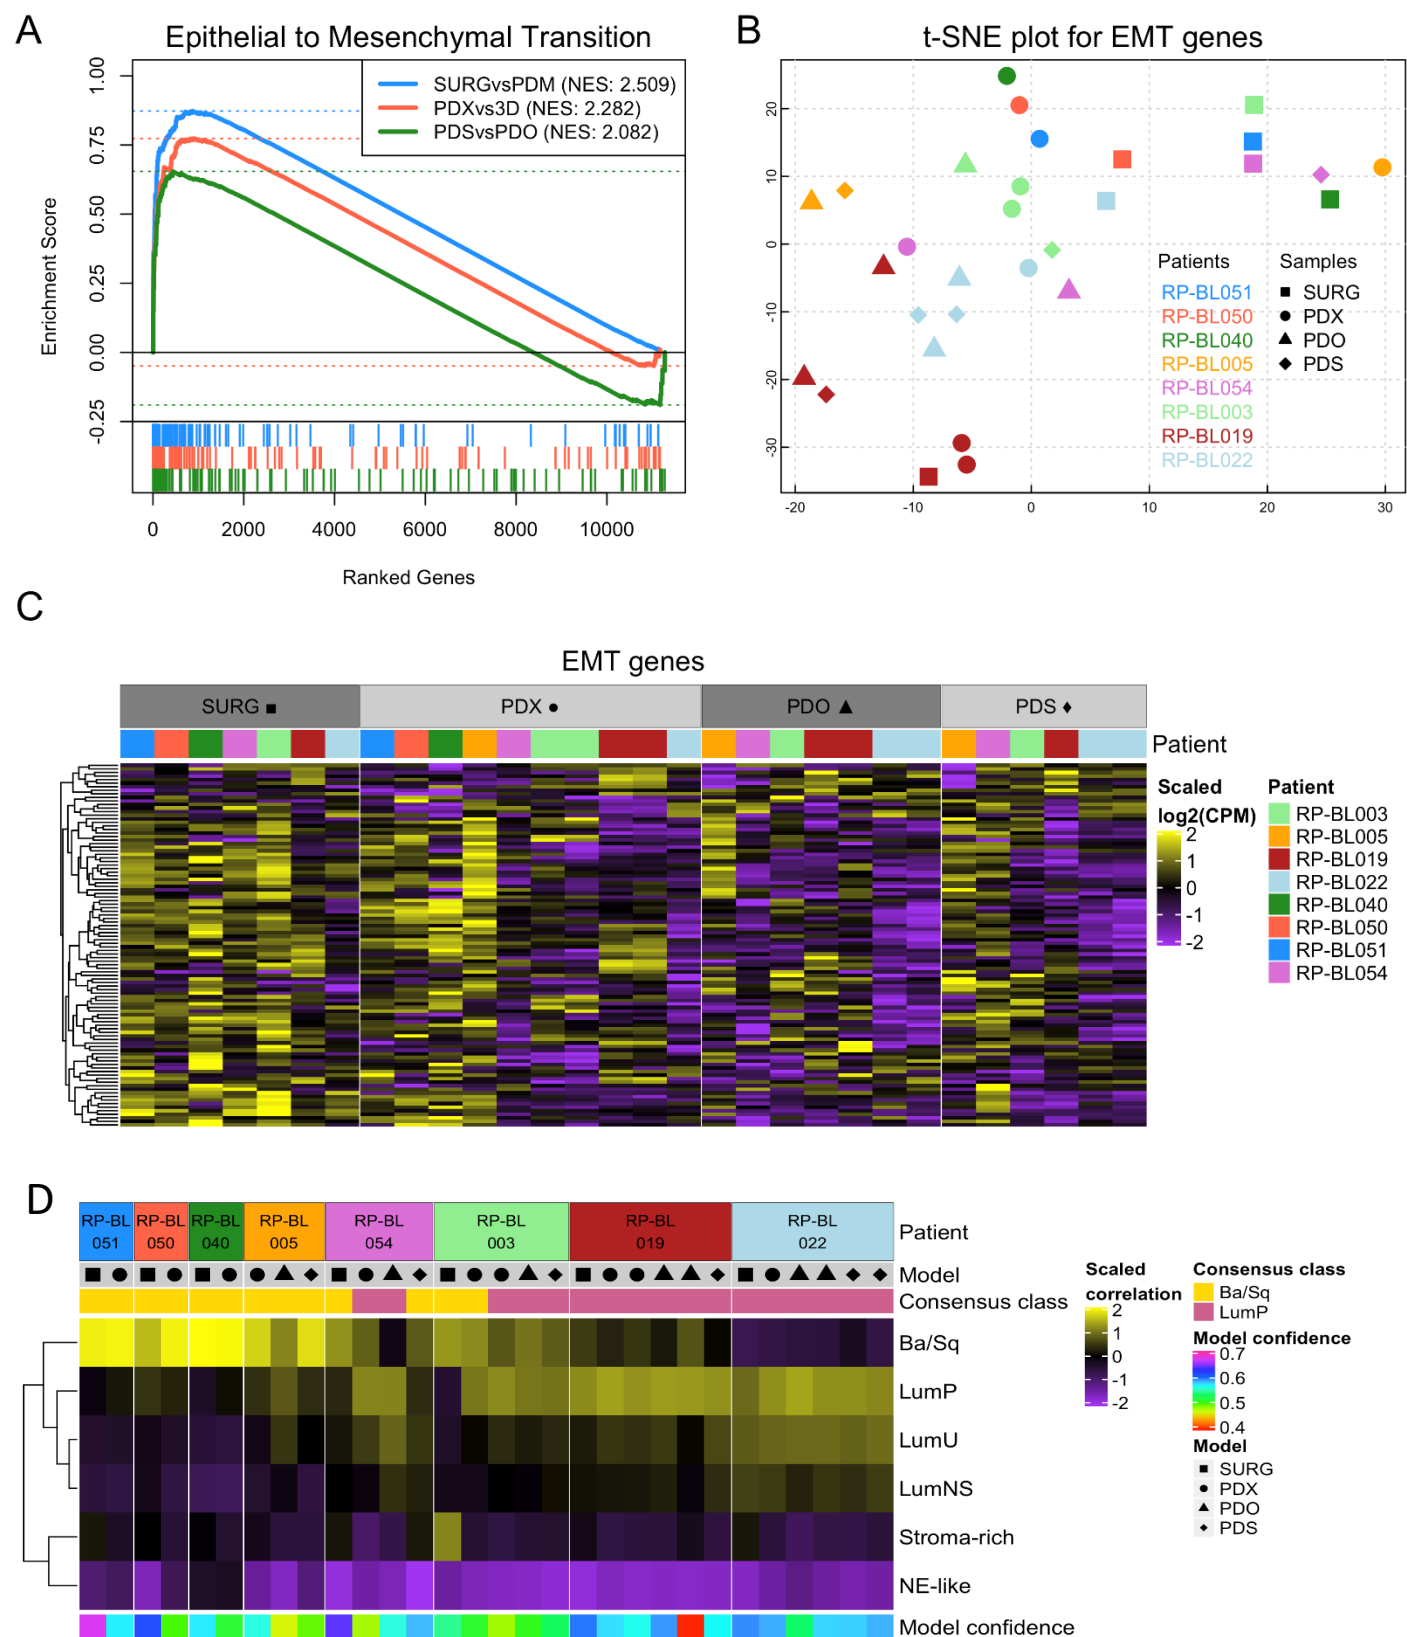

**Figure 4. EMT and Ba/Sq molecular subtypes are enriched in PDMs.**

(A) Gene set enrichment analysis for the hallmark epithelial to mesenchymal transition gene set for 3 different comparisons (PDM vs. SURG, PDX vs. 3D, PDS vs. PDO). (B-C) Expression of the hallmark epithelial to mesenchymal transition genes were used for (B) t-SNE plot and (C) heatmap. (D) Correlation heatmap based on the consensus molecular subtype scores for each sample derived from RNA sequencing data.

**Table 2 Histopathology and molecular subtypes of surgical specimens and PDMs.**

| RP-BL Line | Histopathology                                        |                                                                      | Molecular Subtype |       |       |       |
|------------|-------------------------------------------------------|----------------------------------------------------------------------|-------------------|-------|-------|-------|
|            | Surgical Specimen                                     | PDX                                                                  | Surgical Specimen | PDX   | PDO   | PDS   |
| 051        | HG papillary urothelial carcinoma                     | HG papillary urothelial carcinoma with squamous diff                 | Ba/Sq             | Ba/Sq | ND    | ND    |
| 050        | HG urothelial carcinoma with squamous differentiation | HG papillary urothelial carcinoma with squamous diff                 | Ba/Sq             | Ba/Sq | ND    | ND    |
| 040        | HG with prominent squamous differentiation            | HG papillary urothelial carcinoma with squamous diff                 | Ba/Sq             | Ba/Sq | ND    | ND    |
| 005        | HG urothelial with sarcomatoid features               | HG papillary urothelial carcinoma with sarcomatoid                   | Ba/Sq             | Ba/Sq | Ba/Sq | Ba/Sq |
| 054        | HG papillary urothelial carcinoma                     | HG papillary urothelial carcinoma with squamous diff and sarcomatoid | Ba/Sq             | Ba/Sq | LumP  | Ba/Sq |
| 003        | HG urothelial carcinoma                               | HG papillary urothelial carcinoma with squamous diff                 | Ba/Sq             | LumP  | LumP* | LumP* |
| 019        | HG urothelial carcinoma                               | HG papillary urothelial carcinoma with predominately sarcomatoid     | LumP              | LumP  | LumP  | LumP  |
| 022        | HG papillary urothelial                               | NE differentiation                                                   | LumP              | LumP  | LumP  | LumP  |

ND-Not Determined the quality of RNA was low (RIN= ##) for RP-BL051 PDO and was not analyzed, PDXs were sequenced at passage 2, PDO and PDS models are derived from the sequenced PDX. \*The PDMs derived from RP-BL003 were derived and sequenced from PDX at passage 3. Shaded rows indicate models shown in Figure 5.

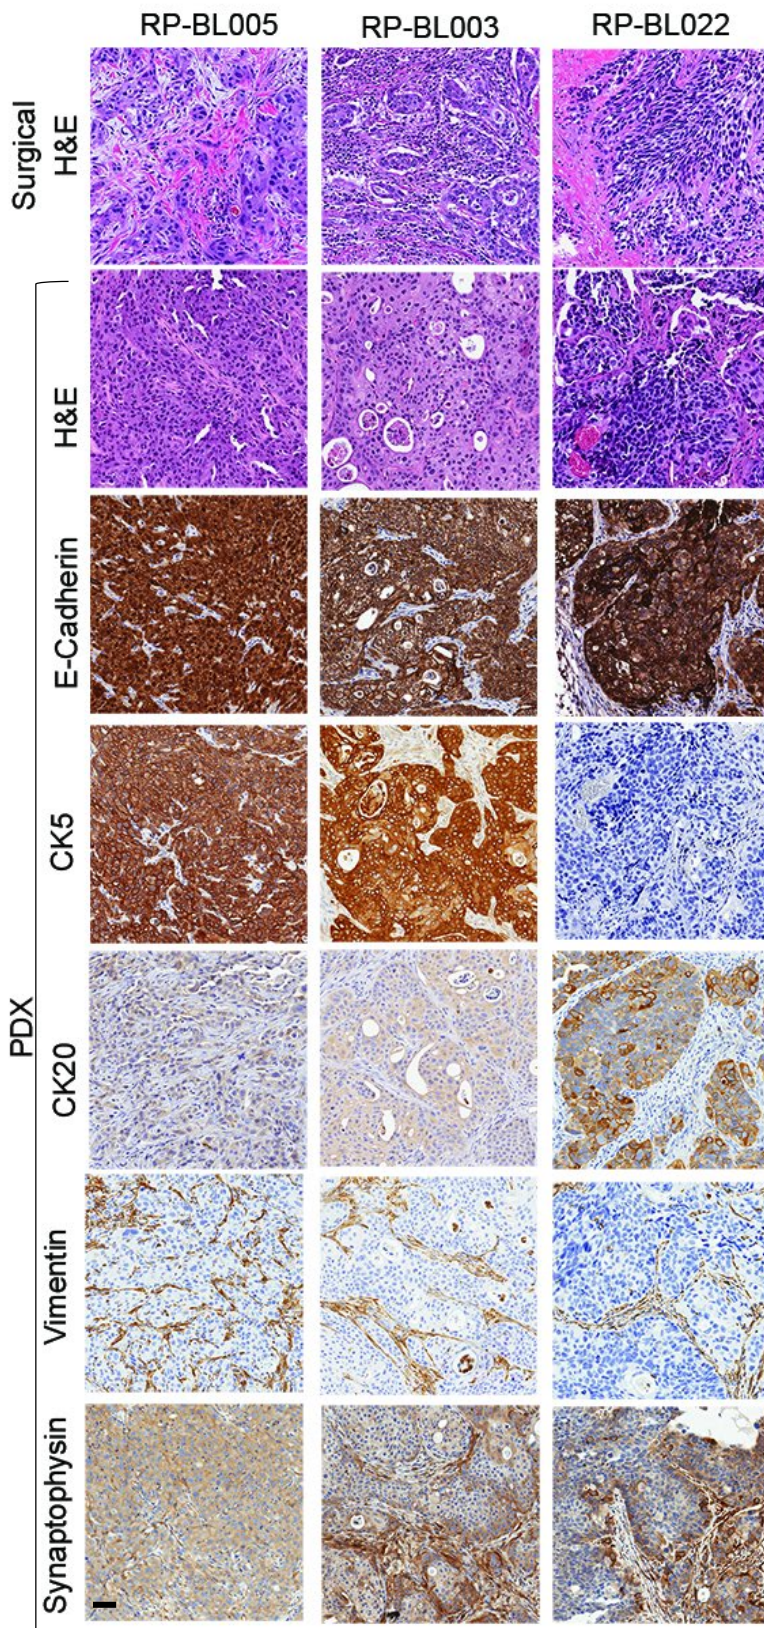

**Figure 5. Pathology and differentiation marker analysis of PDMs with conflicting phenotypes.**

H&E staining of surgical specimens and PDX models derived from the surgical specimens PDX models RP-BL005, -003, and 022. IHC analysis of PDX models for E-Cadherin, CK5, CK20, Vimentin, and Synaptophysin. Bar = 50µm



391 **References**

- 392 1. Kamoun A, de Reynies A, Allory Y, Sjudahl G, Robertson AG, Seiler R, Hoadley KA,  
393 Groeneveld CS, Al-Ahmadie H, Choi W, Castro MAA, Fontugne J, Eriksson P, Mo Q, Kardos J,  
394 Zlotta A, Hartmann A, Dinney CP, Bellmunt J, Powles T, Malats N, Chan KS, Kim WY,  
395 McConkey DJ, Black PC, Dyrskjot L, Hoglund M, Lerner SP, Real FX, Radvanyi F, Bladder  
396 Cancer Molecular Taxonomy G. A Consensus Molecular Classification of Muscle-invasive  
397 Bladder Cancer. *European urology*. 2019. Epub 2019/09/30. doi: 10.1016/j.eururo.2019.09.006.  
398 PubMed PMID: 31563503.
- 399 2. Robertson AG, Kim J, Al-Ahmadie H, Bellmunt J, Guo G, Cherniack AD, Hinoue T, Laird  
400 PW, Hoadley KA, Akbani R, Castro MAA, Gibb EA, Kanchi RS, Gordenin DA, Shukla SA,  
401 Sanchez-Vega F, Hansel DE, Czerniak BA, Reuter VE, Su X, de Sa Carvalho B, Chagas VS,  
402 Mungall KL, Sadeghi S, Pedomallu CS, Lu Y, Klimczak LJ, Zhang J, Choo C, Ojesina AI,  
403 Bullman S, Leraas KM, Lichtenberg TM, Wu CJ, Schultz N, Getz G, Meyerson M, Mills GB,  
404 McConkey DJ, Network TR, Weinstein JN, Kwiatkowski DJ, Lerner SP. Comprehensive  
405 Molecular Characterization of Muscle-Invasive Bladder Cancer. *Cell*. 2017;171(3):540-56 e25.  
406 Epub 2017/10/11. doi: 10.1016/j.cell.2017.09.007. PubMed PMID: 28988769; PMCID:  
407 PMC5687509.
- 408 3. Seiler R, Ashab HAD, Erho N, van Rhijn BWG, Winters B, Douglas J, Van Kessel KE,  
409 Fransen van de Putte EE, Sommerlad M, Wang NQ, Choerung V, Gibb EA, Palmer-Aronsten B,  
410 Lam LL, Buerki C, Davicioni E, Sjudahl G, Kardos J, Hoadley KA, Lerner SP, McConkey DJ,  
411 Choi W, Kim WY, Kiss B, Thalmann GN, Todenhofer T, Crabb SJ, North S, Zwarthoff EC,  
412 Boormans JL, Wright J, Dall'Era M, van der Heijden MS, Black PC. Impact of Molecular  
413 Subtypes in Muscle-invasive Bladder Cancer on Predicting Response and Survival after  
414 Neoadjuvant Chemotherapy. *European urology*. 2017;72(4):544-54. Epub 2017/04/10. doi:  
415 10.1016/j.eururo.2017.03.030. PubMed PMID: 28390739.
- 416 4. Kamoun A, de Reynies A, Allory Y, Sjudahl G, Robertson AG, Seiler R, Hoadley KA,  
417 Groeneveld CS, Al-Ahmadie H, Choi W, Castro MAA, Fontugne J, Eriksson P, Mo Q, Kardos J,  
418 Zlotta A, Hartmann A, Dinney CP, Bellmunt J, Powles T, Malats N, Chan KS, Kim WY,  
419 McConkey DJ, Black PC, Dyrskjot L, Höglund M, Lerner SP, Real FX, Radvanyi F. A  
420 Consensus Molecular Classification of Muscle-invasive Bladder Cancer. *European urology*.  
421 2020;77(4):420-33. Epub 2019/09/30. doi: 10.1016/j.eururo.2019.09.006. PubMed PMID:  
422 31563503.
- 423 5. Taber A, Christensen E, Lamy P, Nordentoft I, Prip F, Lindskrog SV, Birkenkamp-  
424 Demtröder K, Okholm TLH, Knudsen M, Pedersen JS, Steiniche T, Agerbæk M, Jensen JB,  
425 Dyrskjot L. Molecular correlates of cisplatin-based chemotherapy response in muscle invasive  
426 bladder cancer by integrated multi-omics analysis. *Nature communications*. 2020;11(1):4858.  
427 Epub 2020/09/27. doi: 10.1038/s41467-020-18640-0. PubMed PMID: 32978382; PMCID:  
428 PMC7519650 Ferring, and has an advisory/consulting role at Ferring. J.B.J. is proctor for  
429 Intuitive Surgery, member of advisory board for Olympus Europe, Cephaid and Ferring, and has  
430 sponsored research agreements with Medac, Photocure ASA, Cephaid and Ferring. The  
431 following authors declare no competing interests: A.T., E.C., P.L., I.N., F.F.P., S.V.L., K.B.,  
432 T.L.H.O., M.K., J.S.P., M.A., and T.S.
- 433 6. Jager W, Xue H, Hayashi T, Janssen C, Awrey S, Wyatt AW, Anderson S, Moskalev I,  
434 Haegert A, Alshalalfa M, Erho N, Davicioni E, Fazli L, Li E, Collins C, Wang Y, Black PC.  
435 Patient-derived bladder cancer xenografts in the preclinical development of novel targeted  
436 therapies. *Oncotarget*. 2015;6(25):21522-32. Epub 2015/06/05. doi: 10.18632/oncotarget.3974.  
437 PubMed PMID: 26041878; PMCID: PMC4673283.

- 438 7. Lee SH, Hu W, Matulay JT, Silva MV, Owczarek TB, Kim K, Chua CW, Barlow LJ,  
439 Kandoth C, Williams AB, Bergren SK, Pietzak EJ, Anderson CB, Benson MC, Coleman JA,  
440 Taylor BS, Abate-Shen C, McKiernan JM, Al-Ahmadie H, Solit DB, Shen MM. Tumor Evolution  
441 and Drug Response in Patient-Derived Organoid Models of Bladder Cancer. *Cell*.  
442 2018;173(2):515-28 e17. Epub 2018/04/07. doi: 10.1016/j.cell.2018.03.017. PubMed PMID:  
443 29625057; PMCID: PMC5890941.
- 444 8. Pan CX, Zhang H, Tepper CG, Lin TY, Davis RR, Keck J, Ghosh PM, Gill P, Airhart S,  
445 Bult C, Gandara DR, Liu E, de Vere White RW. Development and Characterization of Bladder  
446 Cancer Patient-Derived Xenografts for Molecularly Guided Targeted Therapy. *PloS one*.  
447 2015;10(8):e0134346. doi: 10.1371/journal.pone.0134346. PubMed PMID: 26270481; PMCID:  
448 4535951.
- 449 9. Park B, Jeong BC, Choi Y-L, Kwon GY, Lim JE, Seo SI, Jeon SS, Lee HM, Choi HY, Lee  
450 K-S. Development and characterization of a bladder cancer xenograft model using patient-  
451 derived tumor tissue. *Cancer science*. 2013;104(5):631-8. doi: 10.1111/cas.12123.
- 452 10. Kim K, Hu W, Audenet F, Almassi N, Hanrahan AJ, Murray K, Bagrodia A, Wong N,  
453 Clinton TN, Dason S, Mohan V, Jebiwott S, Nagar K, Gao J, Penson A, Hughes C, Gordon B,  
454 Chen Z, Dong Y, Watson PA, Alvim R, Elzein A, Gao SP, Cocco E, Santin AD, Ostrovnaya I,  
455 Hsieh JJ, Sagi I, Pietzak EJ, Hakimi AA, Rosenberg JE, Iyer G, Vargas HA, Scaltriti M, Al-  
456 Ahmadie H, Solit DB, Coleman JA. Modeling biological and genetic diversity in upper tract  
457 urothelial carcinoma with patient derived xenografts. *Nature communications*. 2020;11(1):1975.  
458 Epub 2020/04/26. doi: 10.1038/s41467-020-15885-7. PubMed PMID: 32332851; PMCID:  
459 PMC7181640 received research funds from Puma Biotechnology, Daiichi-Sankio, Targimmune,  
460 Immunomedics and Menarini Ricerche, is a co-founder of Medendi Medical Travel and in the  
461 past two years he received honoraria from Menarini Ricerche and ADC Pharma. E.J.P. is on the  
462 scientific advisory board for Merck. J.J.H. is a consultant of Eisai (RCC Strategic Council)  
463 (2018-2019) and received research funds from BostonGene (2019). D.B.S. has served as a  
464 consultant and received honoraria from Pfizer, Loxo Oncology, Lilly Oncology, Vivideon  
465 Therapeutics, Q.E.D. Therapeutics and Illumina. A.D.S. is in the Advisory Board of Merck and  
466 Tesaro, received research funds from R-Pharma, Gilead, Genentech, Boheringer, Puma  
467 Biotechnology and Immunomedics. The remaining authors declare no conflicts of interest.
- 468 11. Skowron KB, Pitroda SP, Namm JP, Balogun O, Beckett MA, Zenner ML, Fayanju O,  
469 Huang X, Fernandez C, Zheng W, Qiao G, Chin R, Kron SJ, Khodarev NN, Posner MC,  
470 Steinberg GD, Weichselbaum RR. Basal Tumor Cell Isolation and Patient-Derived Xenograft  
471 Engraftment Identify High-Risk Clinical Bladder Cancers. *Scientific reports*. 2016;6:35854. Epub  
472 2016/10/25. doi: 10.1038/srep35854. PubMed PMID: 27775025; PMCID: PMC5075783.
- 473 12. Wei L, Chintala S, Ciamporcerio E, Ramakrishnan S, Elbanna M, Wang J, Hu Q, Glenn  
474 ST, Murakami M, Liu L, Gomez EC, Sun Y, Conroy J, Miles KM, Malathi K, Ramaiah S,  
475 Anbarasu A, Woloszynska-Read A, Johnson CS, Conroy J, Liu S, Morrison CD, Pili R. Genomic  
476 profiling is predictive of response to cisplatin treatment but not to PI3K inhibition in bladder  
477 cancer patient-derived xenografts. *Oncotarget*. 2016;7(47):76374-89. doi:  
478 10.18632/oncotarget.13062. PubMed PMID: 27823983.
- 479 13. Ghamande S, Hylander BL, Oflazoglu E, Lele S, Fanslow W, Repasky EA. Recombinant  
480 CD40 ligand therapy has significant antitumor effects on CD40-positive ovarian tumor  
481 xenografts grown in SCID mice and demonstrates an augmented effect with cisplatin. *Cancer*  
482 *Res*. 2001;61(20):7556-62. PubMed PMID: 11606394.
- 483 14. Naka T, Sugamura K, Hylander BL, Widmer MB, Rustum YM, Repasky EA. Effects of  
484 tumor necrosis factor-related apoptosis-inducing ligand alone and in combination with

- 485 chemotherapeutic agents on patients' colon tumors grown in SCID mice. *Cancer Res.*  
486 2002;62(20):5800-6. PubMed PMID: 12384541.
- 487 15. Repasky EA, Tims E, Pritchard M, Burd R. Characterization of mild whole-body  
488 hyperthermia protocols using human breast, ovarian, and colon tumors grown in severe  
489 combined immunodeficient mice. *Infect Dis Obstet Gynecol.* 1999;7(1-2):91-7. PubMed PMID:  
490 10231015.
- 491 16. Choi W, Porten S, Kim S, Willis D, Plimack ER, Hoffman-Censits J, Roth B, Cheng T,  
492 Tran M, Lee IL, Melquist J, Bondaruk J, Majewski T, Zhang S, Pretzsch S, Baggerly K, Siefker-  
493 Radtke A, Czerniak B, Dinney CP, McConkey DJ. Identification of distinct basal and luminal  
494 subtypes of muscle-invasive bladder cancer with different sensitivities to frontline  
495 chemotherapy. *Cancer cell.* 2014;25(2):152-65. doi: 10.1016/j.ccr.2014.01.009. PubMed PMID:  
496 24525232; PMCID: 4011497.
- 497 17. Dutt A, Ramos AH, Hammerman PS, Mermel C, Cho J, Sharifnia T, Chande A, Tanaka  
498 KE, Stransky N, Greulich H, Gray NS, Meyerson M. Inhibitor-sensitive FGFR1 amplification in  
499 human non-small cell lung cancer. *PloS one.* 2011;6(6):e20351. doi:  
500 10.1371/journal.pone.0020351. PubMed PMID: 21666749; PMCID: 3110189.
- 501 18. Weiss J, Sos ML, Seidel D, Peifer M, Zander T, Heuckmann JM, Ullrich RT, Menon R,  
502 Maier S, Soltermann A, Moch H, Wagener P, Fischer F, Heynck S, Koker M, Schottle J,  
503 Leenders F, Gabler F, Dabow I, Querings S, Heukamp LC, Balke-Want H, Ansen S, Rauh D,  
504 Baessmann I, Altmuller J, Wainer Z, Conron M, Wright G, Russell P, Solomon B, Brambilla E,  
505 Brambilla C, Lorimier P, Sollberg S, Brustugun OT, Engel-Riedel W, Ludwig C, Petersen I,  
506 Sanger J, Clement J, Groen H, Timens W, Sietsma H, Thunnissen E, Smit E, Heideman D,  
507 Cappuzzo F, Ligorio C, Damiani S, Hallek M, Beroukhim R, Pao W, Klebl B, Baumann M,  
508 Buettner R, Ernestus K, Stoelben E, Wolf J, Nurnberg P, Perner S, Thomas RK. Frequent and  
509 focal FGFR1 amplification associates with therapeutically tractable FGFR1 dependency in  
510 squamous cell lung cancer. *Science translational medicine.* 2010;2(62):62ra93. doi:  
511 10.1126/scitranslmed.3001451. PubMed PMID: 21160078; PMCID: 3990281.
- 512 19. Dontu G, Abdallah WM, Foley JM, Jackson KW, Clarke MF, Kawamura MJ, Wicha MS.  
513 In vitro propagation and transcriptional profiling of human mammary stem/progenitor cells.  
514 *Genes & development.* 2003;17(10):1253-70. doi: 10.1101/gad.1061803. PubMed PMID:  
515 12756227; PMCID: 196056.
- 516 20. Fang DD, Kim YJ, Lee CN, Aggarwal S, McKinnon K, Mesmer D, Norton J, Birse CE, He  
517 T, Ruben SM, Moore PA. Expansion of CD133(+) colon cancer cultures retaining stem cell  
518 properties to enable cancer stem cell target discovery. *British journal of cancer.*  
519 2010;102(8):1265-75. doi: 10.1038/sj.bjc.6605610. PubMed PMID: 20332776; PMCID:  
520 2855999.
- 521 21. Garraway IP, Sun W, Tran CP, Perner S, Zhang B, Goldstein AS, Hahm SA, Haider M,  
522 Head CS, Reiter RE, Rubin MA, Witte ON. Human prostate sphere-forming cells represent a  
523 subset of basal epithelial cells capable of glandular regeneration in vivo. *The Prostate.*  
524 2010;70(5):491-501. doi: 10.1002/pros.21083. PubMed PMID: 19938015; PMCID: 2885946.
- 525 22. Wang L, Mezencev R, Bowen NJ, Matyunina LV, McDonald JF. Isolation and  
526 characterization of stem-like cells from a human ovarian cancer cell line. *Molecular and cellular  
527 biochemistry.* 2012;363(1-2):257-68. doi: 10.1007/s11010-011-1178-6. PubMed PMID:  
528 22160925.
- 529 23. Dirks P. Cancer stem cells: Invitation to a second round. *Nature.* 2010;466(7302):40-1.  
530 Epub 2010/07/03. doi: 466040a [pii]

- 531 10.1038/466040a. PubMed PMID: 20596007.
- 532 24. Yoshida T, Okuyama H, Nakayama M, Endo H, Nonomura N, Nishimura K, Inoue M.  
533 High-dose chemotherapeutics of intravesical chemotherapy rapidly induce mitochondrial  
534 dysfunction in bladder cancer-derived spheroids. *Cancer science*. 2015;106(1):69-77. doi:  
535 10.1111/cas.12567. PubMed PMID: 25363302; PMCID: 4317779.
- 536 25. Gangavarpu KJ, Huss WJ. Isolation and applications of prostate side population cells  
537 based on dye cycle violet efflux. *Current protocols in toxicology / editorial board, Mahin D*  
538 *Maines*. 2011;Chapter 22:Unit 22 2. doi: 10.1002/0471140856.tx2202s47. PubMed PMID:  
539 21400686; PMCID: 3058348.
- 540 26. DeWard AD, Cramer J, Lagasse E. Cellular heterogeneity in the mouse esophagus  
541 implicates the presence of a nonquiescent epithelial stem cell population. *Cell Rep*.  
542 2014;9(2):701-11. doi: 10.1016/j.celrep.2014.09.027. PubMed PMID: 25373907; PMCID:  
543 PMC4223874.
- 544 27. Ge C, Wu S, Wang W, Liu Z, Zhang J, Wang Z, Li R, Zhang Z, Li Z, Dong S, Wang Y,  
545 Xue Y, Yang J, Tan Q, Wang Z, Song X. miR-942 promotes cancer stem cell-like traits in  
546 esophageal squamous cell carcinoma through activation of Wnt/beta-catenin signalling  
547 pathway. *Oncotarget*. 2015;6(13):10964-77. doi: 10.18632/oncotarget.3696. PubMed PMID:  
548 25844602; PMCID: 4484432.
- 549 28. Smit JK, Faber H, Niemantsverdriet M, Baanstra M, Bussink J, Hollema H, van Os RP,  
550 Plukker JT, Coppes RP. Prediction of response to radiotherapy in the treatment of esophageal  
551 cancer using stem cell markers. *Radiotherapy and oncology : journal of the European Society*  
552 *for Therapeutic Radiology and Oncology*. 2013;107(3):434-41. doi:  
553 10.1016/j.radonc.2013.03.027. PubMed PMID: 23684587.
- 554 29. Dobin A, Davis CA, Schlesinger F, Drenkow J, Zaleski C, Jha S, Batut P, Chaisson M,  
555 Gingeras TR. STAR: ultrafast universal RNA-seq aligner. *Bioinformatics*. 2013;29(1):15-21.  
556 Epub 2012/10/30. doi: 10.1093/bioinformatics/bts635. PubMed PMID: 23104886; PMCID:  
557 PMC3530905.
- 558 30. Wang L, Wang S, Li W. RSeQC: quality control of RNA-seq experiments. *Bioinformatics*.  
559 2012;28(16):2184-5. Epub 2012/06/30. doi: 10.1093/bioinformatics/bts356. PubMed PMID:  
560 22743226.
- 561 31. Li B, Dewey CN. RSEM: accurate transcript quantification from RNA-Seq data with or  
562 without a reference genome. *BMC Bioinformatics*. 2011;12:323. Epub 2011/08/06. doi:  
563 10.1186/1471-2105-12-323. PubMed PMID: 21816040; PMCID: PMC3163565.
- 564 32. Robinson MD, McCarthy DJ, Smyth GK. edgeR: a Bioconductor package for differential  
565 expression analysis of digital gene expression data. *Bioinformatics*. 2010;26(1):139-40. Epub  
566 2009/11/17. doi: 10.1093/bioinformatics/btp616. PubMed PMID: 19910308; PMCID:  
567 PMC2796818.
- 568 33. Smyth GK. Linear models and empirical bayes methods for assessing differential  
569 expression in microarray experiments. *Statistical applications in genetics and molecular biology*.  
570 2004;3:Article3. Epub 2006/05/02. doi: 10.2202/1544-6115.1027. PubMed PMID: 16646809.
- 571 34. Kobak D, Berens P. The art of using t-SNE for single-cell transcriptomics. *Nature*  
572 *communications*. 2019;10(1):5416. Epub 2019/11/30. doi: 10.1038/s41467-019-13056-x.  
573 PubMed PMID: 31780648; PMCID: PMC6882829.
- 574 35. Hinton LvdMaG. Visualizing Data using t-SNE. *Journal of Machine Learning Research*.  
575 2008;9(86):2579-605.

- 576 36. Ritchie ME, Phipson B, Wu D, Hu Y, Law CW, Shi W, Smyth GK. limma powers  
577 differential expression analyses for RNA-sequencing and microarray studies. *Nucleic Acids Res.*  
578 2015;43(7):e47. Epub 2015/01/22. doi: 10.1093/nar/gkv007. PubMed PMID: 25605792; PMCID:  
579 PMC4402510.
- 580 37. Korotkevich G, Sukhov V, Sergushichev A. Fast gene set enrichment analysis. *bioRxiv.*  
581 2019:060012. doi: 10.1101/060012.
- 582 38. Liberzon A, Birger C, Thorvaldsdottir H, Ghandi M, Mesirov JP, Tamayo P. The  
583 Molecular Signatures Database (MSigDB) hallmark gene set collection. *Cell Syst.*  
584 2015;1(6):417-25. Epub 2016/01/16. doi: 10.1016/j.cels.2015.12.004. PubMed PMID:  
585 26771021; PMCID: PMC4707969.
- 586 39. Subramanian A, Tamayo P, Mootha VK, Mukherjee S, Ebert BL, Gillette MA, Paulovich  
587 A, Pomeroy SL, Golub TR, Lander ES, Mesirov JP. Gene set enrichment analysis: a  
588 knowledge-based approach for interpreting genome-wide expression profiles. *Proceedings of*  
589 *the National Academy of Sciences of the United States of America.* 2005;102(43):15545-50.  
590 Epub 2005/10/04. doi: 10.1073/pnas.0506580102. PubMed PMID: 16199517; PMCID:  
591 PMC1239896.
- 592
